# Supplementary material for: A universal approach to the preparation of colloidal mesoporous platinum nanoparticles with controlled particle sizes in a wide range from 20 nm to 200 nm
Source: Royal Society of Chemistry journal article supplement (doi:10.1039/c4cp00039k), 2014-01-01
Supplement: c4cp00039k1.pdf [file c4cp00039k1.pdf]

**Supporting information:**

**Materials:** Potassium tetrachloroplatinate(II) ( $K_2PtCl_4$ ),  $H_2SO_4$ , methanol, and ascorbic acid were purchased from Nacalai Tesque Inc. (Kyoto, Japan). The nonionic surfactant (Brij58,  $C_{16}H_{33}(OCH_2CH_2)_{20}OH$ ) was obtained from Sigma-Aldrich, Germany. All the reagents were used without further purification. All solutions were prepared with deionized water treated with a Millipore water purification system (Millipore Corp.).

**Characterization:** Transmission electron microscopic (TEM) images were taken by using a JEOL JEM-2100F microscope using an accelerating voltage at 200 kV. The samples were prepared by depositing a drop of the diluted colloidal suspension on a carbon-coated copper grid. Low-angle XRD patterns were recorded by a Rigaku NANO-Viewer (Cu  $K\alpha$  radiation) with a camera length of 700 mm operated at 40 kV and 30 mA. A wide-angle powder X-ray diffraction (XRD) pattern was recorded with a Rigaku Rint 2500 diffractometer with monochromated Cu  $K\alpha$  radiation. Cyclic voltammetry was recorded by using a CHI 842B electrochemical analyzer (CH Instruments Inc., Austin, TX). A conventional three electrode cell was used, including a Ag/AgCl electrode as reference electrode, a platinum wire as counter electrode, and a working electrode. The working electrode was prepared by depositing the samples on a glassy carbon electrode (3 mm in diameter). The GCE was coated with MPNs at the same loading of 5.0  $\mu g$  and dried completely at room temperature before the electrochemical experiments. All potential values were referenced to the Ag/AgCl electrode.

**Figure S1**

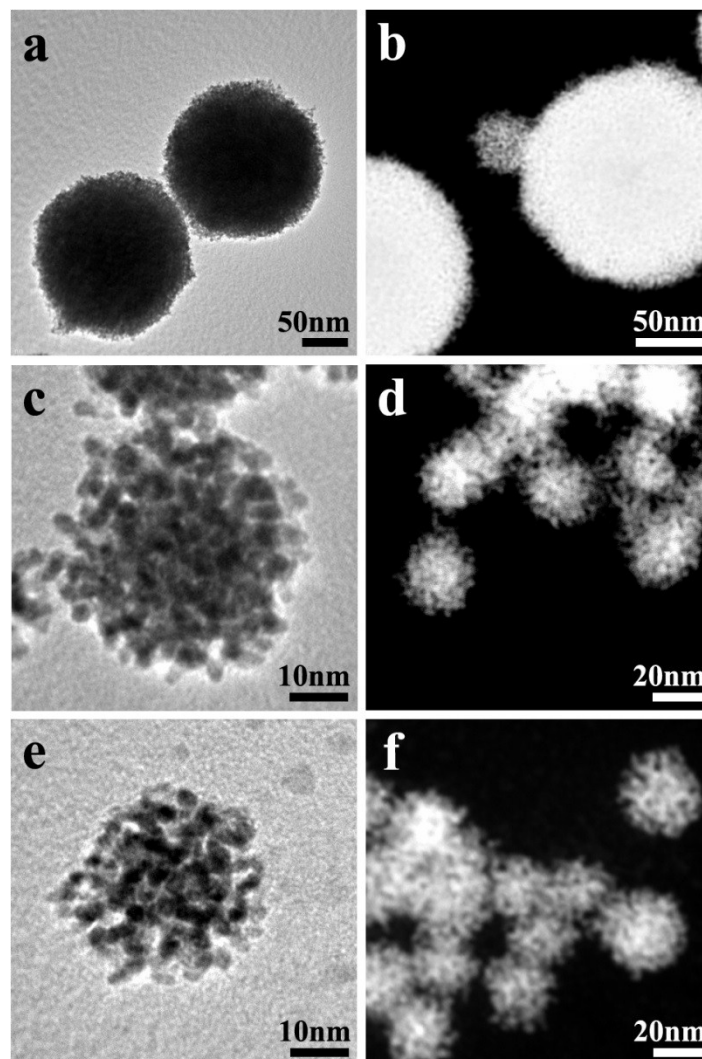

**Figure S1** (a, c, and e) Bright-field TEM images and (b, d, and f) high-angle annular dark-field scanning TEM (HAADF-STEM) images for (a, and b) MPN1, (c and d) MPN5, and (e and f) MPN7 prepared with 0.01 wt%, 10.0 wt%, and 20.0 wt% Brij58, respectively.

**Figure S2**

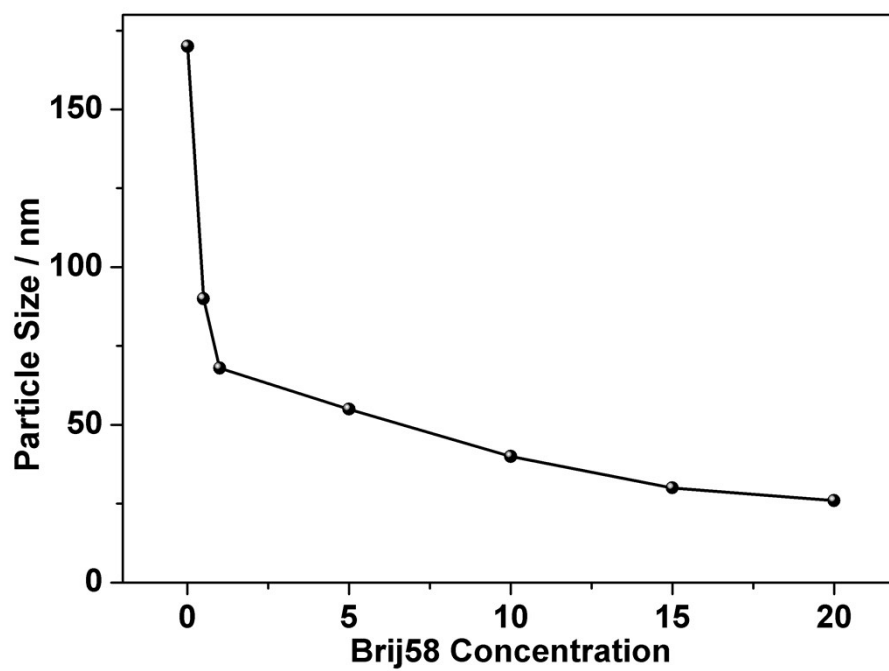

**Figure S2** Relationship between the particle size and the Brij58 concentration.

**Figure S3**

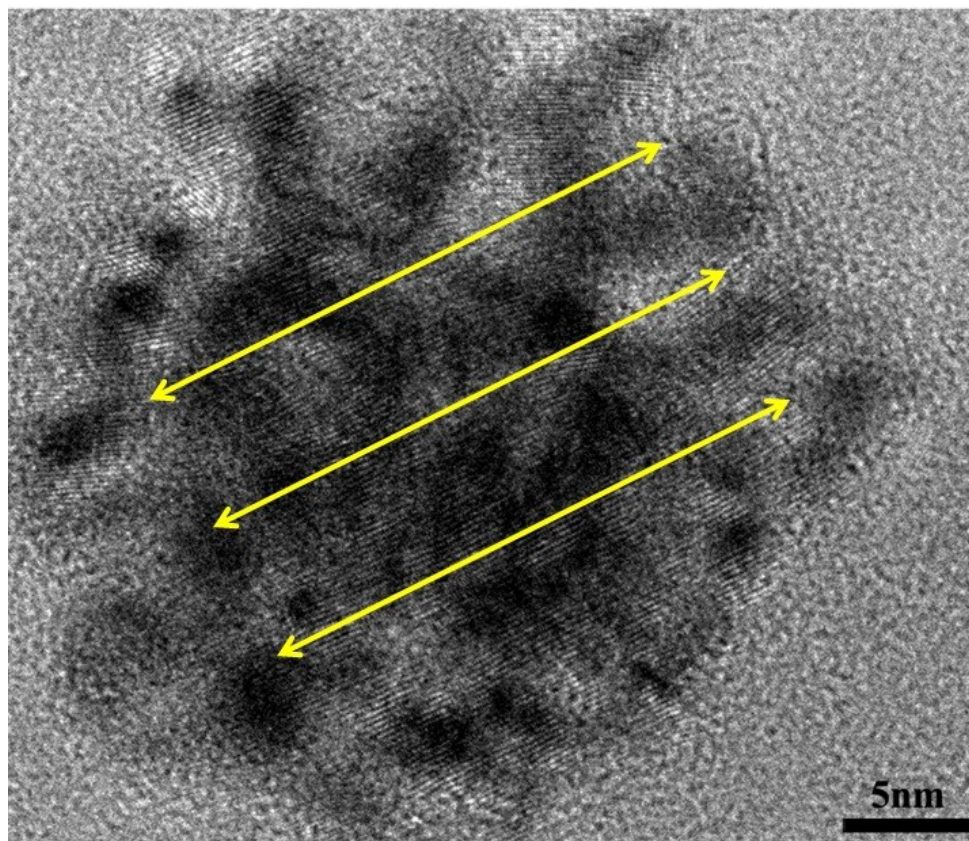

**Figure S3** High-resolution TEM image for MPN7 prepared with 20.0 wt% Brij58.
